# Supplementary material for: Aflatoxin exposure during the first 36 months of life was not associated with impaired growth in Nepalese children: An extension of the MAL-ED study
Source: PLoS One. 2017 Feb 17;12(2):e0172124. doi: 10.1371/journal.pone.0172124 (PMC5315312; doi:10.1371/journal.pone.0172124)
Supplement: S1 Dataset — (XLSX) [file pone.0172124.s001.xlsx]

## Sheet: NP_alflatoxin_blood-dataset
Subject	month_ss_BRF	agedays_BRF	EDUCATION	minapart	minamilk	minasolid	minanobf	BW	BWZ	Enroll_W	Enroll_WZ	zlen	zhei	zwei	zwfl	zwfh	RARCONC	ZARCONC	anemia	Average fe	Average zn	Average vita	Average grains	asset	overall	wami	AFB1	AFB1-quartiles
1	15	457	0	138	267	138	820			2.47	-2.97	-3.48		-5.1	-5.13		19.4	75.4	1	0.91155	0.694175	43.8797	3.75	1	15	0.46	3.27475	2
1	24	734	0	138	267	138	820			2.47	-2.97	-3.55		-3.5	-2.46		31.5	65.6	1	1.66758	1.56604	75.3748	4.77778	4	19	0.59	4.58627	3
1	36	1095	0	138	267	138	820			2.47	-2.97	-3.44	-3.39	-3.26	-1.9	-1.95				4.16021	3.53399	143.821	5.09091	4	18	0.56	3.38092	2
2	15	458	0	11	11	11	721	2.9	-0.96	2.33	-3.01	-1.51		-0.19	0.64		37.3	68.5	1	0.889857	1.35374	106.369	3.71429	6	21	0.65	1.499	1
2	24	733	0	11	11	11	721	2.9	-0.96	2.33	-3.01	-1.6		-0.58	0.37		22.4	45.5	1	1.22941	2.02917	173.405	3.6	5	16	0.5	1.68159	1
2	36	1095	0	11	11	11	721	2.9	-0.96	2.33	-3.01	-1.79	-1.98	-0.64	0.49	0.65				1.21537	2.0921	189.444	4.58333	6	19	0.59	3.72048	2
3	15	456	2	174	231	174	699	3.5	0.31	3.55	-0.16	1.55		0.26	-0.5		29.3	76.7	0	0.987757	0.885457	33.1627	2.42857	4	17	0.53	12.0836	4
3	24	732	2	174	231	174	699	3.5	0.31	3.55	-0.16	0.4		0.35	0.16		24.4	57.2	0	1.9547	1.51623	127.564	2.4	4	16	0.5	4.87745	3
3	36	1098	2	174	231	174	699	3.5	0.31	3.55	-0.16	-0.07	-0.01	-0.02	0.04	0				3.09465	3.02513	149.578	3.5	4	15	0.46	5.14158	3
4	15	456	10	19	58	19	772	2.7	-1.23	2.76	-1.67	-1.46		-2.55	-2.58		19.5	84.6	1	0.906457	1.0042	67.9357	4	7	26	0.81	7.56946	3
4	24	732	10	19	58	19	772	2.7	-1.23	2.76	-1.67	-1.61		-1.05	-0.26		44.2	70.4	0	1.80559	1.75773	137.364	5.9	7	27	0.84	3.80064	2
4	36	1094	10	19	58	19	772	2.7	-1.23	2.76	-1.67	-1.74	-1.66	-1.16	-0.28	-0.35				3.08845	3.19228	217.724	7	7	25	0.78	2.29868	2
5	15	457	10	124	151	124	720	2	-3.09	2.08	-2.98	-2.84		-2.22	-1.06		26.5	81.9	1	1.36219	0.864838	33.6621	3.25	8	24	0.75	4.93371	3
5	24	736	10	124	151	124	720	2	-3.09	2.08	-2.98	-2.97		-2.94	-1.79		17.9	67.2	1	1.72861	1.0206	63.4746	3.66667	8	24	0.75	6.99559	3
5	36	1096	10	124	151	124	720	2	-3.09	2.08	-2.98	-3.47	-3.52	-2.78	-0.86	-0.81				2.27937	1.83292	123.24	5.33333	8	26	0.81	7.81268	4
6	15	455	8	10	10	17	625	3	-0.52	3.22	-0.5	0.35		0.11	-0.06		28.6	79.9	0	1.41348	1.06217	50.6754	2.59092	8	27	0.84	3.93469	3
6	24	729	8	10	10	17	625	3	-0.52	3.22	-0.5	0.19		0.36	0.26		33.1	63.1	0	3.06238	2.49589	119.976	3.6	8	27	0.84	2.94718	2
6	36	1094	8	10	10	17	625	3	-0.52	3.22	-0.5	-0.19	-0.34	0.31	0.54	0.66				3.97577	3.26957	167.642	4.75	8	27	0.84	8.61451	4
7	15	456	10	111	209	111		2.75	-1.3	3.09	-1.03	-0.6		-2.25	-2.74		22.1	90	0	1.09303	0.637614	20.6609	3.42857	8	27	0.84	7.07561	3
7	24	731	10	111	209	111		2.75	-1.3	3.09	-1.03	-0.97		-1.44	-1.32		22.1	77.3	0	1.20601	1.1338	539.382	3.1	8	27	0.84	4.44404	3
7	36	1094	10	111	209	111		2.75	-1.3	3.09	-1.03	-0.93	-0.88	-1.55	-1.6	-1.65				2.44104	1.90169	94.5451	3.5	8	27	0.84	4.62051	3
8	15	459	9	93	93	112	905	3	-0.52	3.36	-0.49	-2.14		-2.07	-1.42		29.4	90.5	0	0.344286	0.822157	2.22357	3.14286				16.9287	4
8	24	733	9	93	93	112	905	3	-0.52	3.36	-0.49	-2.6		-2.13	-0.98		30	91.4	0	1.32445	2.2198	148.831	3.4	7	23	0.73	4.03291	2
8	36	1097	9	93	93	112	905	3	-0.52	3.36	-0.49	-2.82	-2.85	-2.78	-1.5	-1.47				1.7331	1.86258	64.3278	4.75	7	22	0.7	1.75478	1
9	15	456	12	83	87	83	566	2.75	-1.3	2.9	-1.38	-1.83		-1.39	-0.75		20.6	85.1	1	0.4427	0.694257	32.5069	3.42857	2	18	0.56	130.085	4
9	24	731	12	83	87	83	566	2.75	-1.3	2.9	-1.38	-1.96		-0.87	0.22		16.1	79.1	0	1.49551	2.52985	240.686	5.3	3	21	0.65	6.35811	3
9	36	1097	12	83	87	83	566	2.75	-1.3	2.9	-1.38	-1.62	-1.57	-0.75	0.18	0.14				3.1389	3.2538	364.54	6.08333	6	25	0.78	2.10614	2
10	15	459	12	117	170	117	684	3.5	0.31	3.65	-0.28	-0.47		0.01	0.29		28.7	86	0	1.9242	2.19136	59.6992	4.125	7	27	0.84	5.98754	3
10	24	729	12	117	170	117	684	3.5	0.31	3.65	-0.28	-0.91		0.11	0.81		26.4	75.4	0	2.79056	2.95036	168.974	4.88889	7	27	0.84	3.91427	2
10	36	1096	12	117	170	117	684	3.5	0.31	3.65	-0.28	-1.15	-1.23	-0.5	0.18	0.24				3.63172	3.81577	207.192	4.91667	6	25	0.78	10.8753	4
11	15	472	1	139	286	139	863	3	-0.52	3.15	-0.46	-0.39		-1.8	-2.26		20	67.2	1	0.520375	0.47575	37.7331	2.5				6.1528	3
11	24	731	1	139	286	139	863	3	-0.52	3.15	-0.46	-0.91		-1.22	-1.06		18.7	90.8	0	2.58818	1.35791	67.1723	3.44444	6	20	0.64	5.0066	3
11	36	1094	1	139	286	139	863	3	-0.52	3.15	-0.46	-1.24	-1.26	-1.51	-1.2	-1.18				4.09496	3.34738	109.247	4.41667	8	23	0.73	1.00847	1
12	15	455	10	35	290	35	722	2.8	-1.18	2.77	-2.23	-0.04		-0.54	-0.69		31.5	55.8	0	2.09063	2.06056	28.8544	3.71429	8	27	0.84	1.88792	1
12	24	733	10	35	290	35	722	2.8	-1.18	2.77	-2.23	-0.06		-0.49	-0.7		21.6	60.4	1	3.2994	3.1485	119.042	4.2	8	26	0.81	1.21072	1
12	36	1096	10	35	290	35	722	2.8	-1.18	2.77	-2.23	0.06	-0.02	-0.51	-0.81	-0.74				3.32822	3.96602	232.05	4.58333	6	24	0.75	1.90633	1
13	15	455	0	148	554	148	708	3.6	0.51	4	0.45	0.4		0.17	0.04		30.4	88.2	1	0.376371	0.322314	9.41143	1.71429	3	14	0.43	1.81239	1
13	24	729	0	148	554	148	708	3.6	0.51	4	0.45	-1.4		-1.15	-0.56		12	78.9	0	1.06456	1.31416	77.348	3.6	4	15	0.46	3.95996	2
13	36	1094	0	148	554	148	708	3.6	0.51	4	0.45	-1.79	-1.63	-1.17	-0.29	-0.43				3.13847	2.59365	179.853	5.66667	4	15	0.46	1.40458	1
14	15	457	10	138	240	138	755	3	-0.52	3.46	-0.15	-0.26		-0.52	-0.57		25.9	66.2	0	0.805657	0.715857	41.9287	3.14286	7	26	0.81	0.532527	1
14	24	732	10	138	240	138	755	3	-0.52	3.46	-0.15	-0.36		-0.54	-0.56		28.7	78	0	1.2985	1.17052	105.027	3.6	8	26	0.81	2.12479	2
14	36	1094	10	138	240	138	755	3	-0.52	3.46	-0.15	-0.87	-1.11	-0.78	-0.47	-0.28				3.22549	2.71091	199.934	5.83333	8	25	0.78	3.65762	2
15	15	460	12	186	221	186	906	3.6	0.51	3.87	0.66	-1.39		-0.77	-0.19		19	77.4	0	1.26135	0.70935	27.6481	3.375	3	21	0.65	15.9689	4
15	24	732	12	186	221	186	906	3.6	0.51	3.87	0.66	-1.51		-0.95	-0.2		21.7	95	0	2.20834	1.47613	47.5068	4.88889	3	24	0.75	3.32109	2
15	36	1094	12	186	221	186	906	3.6	0.51	3.87	0.66	-1.69	-1.71	-0.67	0.36	0.38				2.95633	3.12475	137.649	4.16667	3	24	0.75	2.69539	2
16	15	458	8	11	11	26	869	2.3	-2.25	2.25	-2.9	-1.3		-1.14	-0.77		26.5	66.2	1	0.893486	0.850214	63.2671	3.28571	6	24	0.75	7.74171	4
16	24	730	8	11	11	26	869	2.3	-2.25	2.25	-2.9	-1.05		-1.05	-0.7		29.9	83.4	0	0.85823	0.83276	43.7489	3.7	2	15	0.46	7.62684	3
16	36	1094	8	11	11	26	869	2.3	-2.25	2.25	-2.9	-1.5	-1.58	-1.62	-1.13	-1.06				2.3948	2.37068	118.426	5.16667	4	17	0.53	2.79812	2
17	15	468	10	12	12	25	849	3.25	0.04	3.54	0.01	-0.28		-0.37	-0.36		27.8	72.2	0	1.0068	0.957514	18.1417	3.42857	8	29	0.9	2.43828	2
17	24	735	10	12	12	25	849	3.25	0.04	3.54	0.01	-0.5		-0.24	-0.04		13.3	76.6	0	1.02239	1.4008	90.8482	3.5	8	29	0.9	0.45	1
17	36	1095	10	12	12	25	849	3.25	0.04	3.54	0.01	-0.61	-0.95	-0.05	0.36	0.63				2.92711	4.01484	244.424	4.91667	8	29	0.9	4.26595	3
18	15	461	8	147	394	147	704	2.2	-2.67	2.46	-2.67	-2.82		-2.6	-1.71		25.8	74.9	0	1.76995	1.07698	48.4757	4.125	3	17	0.53	22.612	4
18	24	733	8	147	394	147	704	2.2	-2.67	2.46	-2.67	-2.71		-2.61	-1.71		19.9	87.4	1	2.21858	1.42631	64.6819	3.88889	4	19	0.59	2.87842	2
18	36	1095	8	147	394	147	704	2.2	-2.67	2.46	-2.67	-2.91	-2.99	-2.78	-1.67	-1.59				3.80532	4.26155	300.098	4.25	4	21	0.65	1.23353	1
19	15	454	9	102	179	102	892	3.25	-0.2	3.26	-0.53	-1.63		0.55	1.67		36.3	69.9	0	1.95134	1.5462	77.126	5.14286	6	22	0.7	32.8575	4
19	24	729	9	102	179	102	892	3.25	-0.2	3.26	-0.53	-0.61		0.39	0.97		29	69.4	0	2.85899	3.40969	290.857	5.4	6	22	0.7	0.45	1
19	36	1094	9	102	179	102	892	3.25	-0.2	3.26	-0.53	-0.74	-0.82	-0.02	0.57	0.63				4.01233	3.34831	217.188	4.81818	6	23	0.73	3.40217	2
20	15	461	8	146	609	146	727	2.6	-1.47	2.72	-1.37	-1.6		-1.2	-0.64		42.9	80.2	1	0.576314	0.413971	8.66014	2.14286	7	25	0.78	7.15465	3
20	24	734	8	146	609	146	727	2.6	-1.47	2.72	-1.37	-1.93		-1.24	-0.28		32	61.6	0	0.91737	1.20318	61.8549	4.2	6	24	0.75	6.15285	3
20	36	1095	8	146	609	146	727	2.6	-1.47	2.72	-1.37	-1.71	-1.71	-1.69	-1.04	-1.04				2.90199	3.45412	176.464	6.16667	7	23	0.71	0.45	1
21	15	456	10	76	76	100	779	3.45	0.21	3.83	-0.02	-1.32		-1.14	-0.75		24.2	57.4	1	1.59997	1.67151	136.876	4	5	24	0.75	0.975724	1
21	24	729	10	76	76	100	779	3.45	0.21	3.83	-0.02	-1.37		-1.15	-0.59		18.6	58.8	0	2.41293	2.27939	115.268	4.90909	6	24	0.75	0.45	1
21	36	1096	10	76	76	100	779	3.45	0.21	3.83	-0.02	-1.7	-1.7	-1.38	-0.69	-0.69				3.6981	3.3502	199.824	6	5	23	0.71	0.45	1
22	15	458	8	29	210	29	737	2.75	-1.3	2.96	-1.25	-1.58		-0.89	-0.24		39.6	63.3	0	1.14939	1.57584	104.239	3.57143	6	20	0.62	2.82607	2
22	24	734	8	29	210	29	737	2.75	-1.3	2.96	-1.25	-2.39		-1.5	-0.35		41.1	56.7	0	1.83234	2.19849	146.76	4	5	19	0.59	0.45	1
22	36	1098	8	29	210	29	737	2.75	-1.3	2.96	-1.25	-2.42	-2.45	-1.74	-0.59	-0.56				3.6916	4.72044	305.638	5.33333	5	20	0.62	9.86282	4
23	15	456	7	162	235	162	878	3.2	-0.3	3.34	-0.43	-1		-1.08	-0.86		35.6	66.1	0	3.84583	2.11156	221.944	5.14286	2	20	0.64	8.31775	4
23	24	730	7	162	235	162	878	3.2	-0.3	3.34	-0.43	-1.11		-1.32	-1.03		23.5	62.5	0	2.55044	2.35189	296.368	4.55556	3	20	0.64	1.45436	1
23	36	1096	7	162	235	162	878	3.2	-0.3	3.34	-0.43	-1.58	-1.69	-1.3	-0.68	-0.59				4.382	3.82343	290.505	5.58333	3	20	0.64	0.45	1
24	15	456	9	79	107	79	807	2.6	-1.65	2.95	-1.42	-2.03		-1.53	-0.81		23.4	64.4	0	1.30678	1.1344	65.9844	2.625	6	24	0.76	0.45	1
24	24	732	9	79	107	79	807	2.6	-1.65	2.95	-1.42	-2.24		-2.02	-1.18		31.9	53.3	0	1.0159	1.14058	67.3288	3.77778	6	24	0.76	2.21519	2
24	36	1095	9	79	107	79	807	2.6	-1.65	2.95	-1.42	-2.47	-2.55	-2.03	-0.96	-0.89				2.67657	2.36989	116.501	5.08333	6	24	0.76	2.9658	2
25	15	455	0	98	151	98	862	3.5	0.31	3.55	0.12	-0.87		-0.11	0.36		25.4	59.6	1	1.5639	1.7313	95.662	3.75	4	16	0.5	2.60188	2
25	24	730	0	98	151	98	862	3.5	0.31	3.55	0.12	-1.24		-1.32	-0.93		19.4	58.7	1	1.69986	2.03113	132.463	4	4	13	0.4	0.45	1
25	36	1096	0	98	151	98	862	3.5	0.31	3.55	0.12	-1.7	-1.64	-0.63	0.44	0.39				3.81854	2.79878	109.835	5.25	4	20	0.62	3.66432	2
26	15	455	10	153	695	153	751	2.9	-0.75	3.27	-0.4	-0.35		-0.79	-0.89		28.3	69.6	1	0.891257	0.816743	61.382	3	6	22	0.68	5.79142	3
26	24	731	10	153	695	153	751	2.9	-0.75	3.27	-0.4	-0.51		-1.33	-1.53		22	63.7	0	1.25329	0.94232	71.1497	3.6	6	21	0.65	1.9539	1
26	36	1096	10	153	695	153	751	2.9	-0.75	3.27	-0.4	-1.38	-1.62	-1.64	-1.27	-1.06				3.04041	2.61836	146.154	5.66667	6	26	0.81	2.71942	2
27	15	455	7	91	232	91	623	3.1	-0.52	3.27	-1.12	-0.35		0.3	0.61		38.7	77.3	0	2.37555	1.15803	94.3765	3.25	7	24	0.76	1.53536	1
27	24	730	7	91	232	91	623	3.1	-0.52	3.27	-1.12	-0.75		-0.48	-0.13		28.9	72.8	0	2.19772	2.26342	196.513	3.33333	7	24	0.76	6.6315	3
27	36	1094	7	91	232	91	623	3.1	-0.52	3.27	-1.12	-0.9	-0.96	-0.66	-0.27	-0.23				5.26412	4.85231	129.219	4.91667	7	25	0.79	1.01442	1
28	15	458	11	32	32	35	746	3.2	-0.3	3.56	-0.53	-0.96		-0.18	0.31		21.9	66.5	0	0.9951	1.04671	33.6946	3.875	6	27	0.85	3.6598	2
28	24	730	11	32	32	35	746	3.2	-0.3	3.56	-0.53	-0.52		-1.64	-2		18.9	57.2	0	2.68353	2.12492	41.2873	4.44444	7	27	0.85	3.35475	2
28	36	1094	11	32	32	35	746	3.2	-0.3	3.56	-0.53	-0.66	-0.74	-0.22	0.2	0.26				4.26828	4.16935	182.205	5.75	7	27	0.85	144.163	4
29	15	455	10	52	90	52	730	3	-0.73	3.13	-0.54	-1.26		-0.88	-0.42		24.1	65.9	1	1.25202	1.57372	88.5926	4.55556	7	24	0.75	9.32525	4
29	24	733	10	52	90	52	730	3	-0.73	3.13	-0.54	-1.51		-1.58	-1.09		18.2	59	0	1.55847	1.40238	105.134	3.11111	7	20	0.62	1.8592	1
29	36	1095	10	52	90	52	730	3	-0.73	3.13	-0.54	-2.09	-2.12	-2.03	-1.34	-1.31				2.46668	2.35373	39.9218	5.16667	7	21	0.65	1.82483	1
30	15	459	10	82	82	92	628	3.25	-0.2	3.85	0.1	-0.88		-0.21	0.23		30.8	74.8	0	1.19436	2.49677	150.817	5.85714	6	25	0.78	8.54455	4
30	24	732	10	82	82	92	628	3.25	-0.2	3.85	0.1	-1.26		0.52	1.61		25.3	63.5	0	2.87232	3.38909	241.42	5.4	6	25	0.78	3.62632	2
30	36	1094	10	82	82	92	628	3.25	-0.2	3.85	0.1	-0.98	-1.12	-0.5	0.05	0.16				5.24107	4.74273	259.999	6.08333	6	25	0.78	2.94108	2
31	15	456	8	42	42	87	721	2.5	-1.73	3.14	-0.67	-0.91		0.33	0.97		23.7	73.1	0	1.34297	1.02963	66.6177	4	7	23	0.71	5.72394	3
31	24	734	8	42	42	87	721	2.5	-1.73	3.14	-0.67	-1.2		-0.15	0.63		28.9	65.9	0	2.58051	1.49066	77.288	6.2	6	24	0.75	1.95285	1
31	36	1094	8	42	42	87	721	2.5	-1.73	3.14	-0.67	-1.64	-1.74	-0.17	1.02	1.11				3.57037	2.69876	204.066	5.58333	7	21	0.65	0.45	1
32	15	456	9	13	79	13	803	3.1	-0.29	2.9	-1.41	-0.4		-0.9	-1.02		26.6	77.3	0	0.7586	0.817687	57.7751	3.625	6	25	0.79	15.0465	4
32	24	730	9	13	79	13	803	3.1	-0.29	2.9	-1.41	-0.9		-1.16	-0.97		25.3	62.5	0	1.13031	0.860922	43.0572	3.33333	6	25	0.79	2.81162	2
32	36	1095	9	13	79	13	803	3.1	-0.29	2.9	-1.41	-1.19	-1.32	-1.2	-0.8	-0.69				3.15187	2.69986	162.564	6.16667	6	25	0.79	3.29272	2
33	15	456	8	66	66	66	955	3.15	-0.41	3.33	-0.6	-0.68		-0.02	0.36		22.4	73.1	0	0.581771	0.461	21.0484	3.42857	7	26	0.81	9.33734	4
33	24	734	8	66	66	66	955	3.15	-0.41	3.33	-0.6	-1.07		-0.4	0.23		14.4	59.2	0	1.58902	1.11876	102.75	2.66667	3	21	0.65	1.94786	1
33	36	1094	8	66	66	66	955	3.15	-0.41	3.33	-0.6	-1.28	-1.36	-0.31	0.57	0.63				3.40486	3.44192	360.808	3.91667	6	19	0.59	2.01541	1
34	15	462	4	57	126	57	728	2.6	-1.65	3	-1.3	-1.62		-1.13	-0.54		31.7	72.6	0	0.381025	0.519937	36.5574	3	5	18	0.56	1.94397	1
34	24	731	4	57	126	57	728	2.6	-1.65	3	-1.3	-1.7		-1	-0.13		22.6	45.8	0	1.41431	1.55314	148.666	3.11111	5	18	0.56	2.43109	2
34	36	1094	4	57	126	57	728	2.6	-1.65	3	-1.3	-1.47	-1.55	-1.04	-0.37	-0.3				2.0444	2.96722	238.674	3.66667	7	20	0.62	3.4254	2
35	15	457	7	25	103	25	747	2.8	-1.18	2.75	-1.52	-0.75		-0.41	-0.1		17.4	67.6	0	0.959114	0.855286	74.274	3.42857	5	22	0.7	18.4114	4
35	24	735	7	25	103	25	747	2.8	-1.18	2.75	-1.52	-0.1		-1.23	-1.74		16.6	68.5	1	1.38314	1.02421	59.7986	2.875	4	21	0.67	6.10104	3
35	36	1095	7	25	103	25	747	2.8	-1.18	2.75	-1.52	-0.48	-0.45	-1.16	-1.37	-1.39				4.17323	3.34289	93.4551	5.09091	4	21	0.67	19.5981	4
36	15	457	10	80	91	80	811	2.8	-1.18	3.18	-1.23	-0.26		0.33	0.6		39.8	73.9	0	2.23135	1.99033	59.1845	3.75	6	20	0.62	6.00286	3
36	24	733	10	80	91	80	811	2.8	-1.18	3.18	-1.23	-0.83		0.03	0.64		42.7	57.8	0	2.49336	1.83682	30.8633	4.33333	6	23	0.73	14.9456	4
36	36	1094	10	80	91	80	811	2.8	-1.18	3.18	-1.23	-0.88	-0.96	-0.01	0.69	0.75				3.39707	3.10982	145.945	4	4	21	0.67	12.7441	4
37	15	454	5	140	178	140	714	2.8	-0.99	3.29	-0.29	-0.34		0.85	1.33		25.1	69.1	1	0.70085	0.593063	29.7137	2.875	3	15	0.48	11.1328	4
37	24	729	5	140	178	140	714	2.8	-0.99	3.29	-0.29	-0.27		0.04	0.18		11.1	42.1	0	1.22331	1.29303	138.375	3.44444	4	17	0.54	3.05785	2
37	36	1094	5	140	178	140	714	2.8	-0.99	3.29	-0.29	-0.82	-0.87	0.24	0.94	0.98				2.26486	2.93306	226.895	4.75	4	16	0.51	1.86905	1
38	15	459	10	15	204	15	776	3	-0.73	3.22	-1.22	0.21		-0.18	-0.33		17.8	89	1	0.915587	0.663975	55.8603	3.75	7	26	0.81	0.45	1
38	24	733	10	15	204	15	776	3	-0.73	3.22	-1.22	-0.21		-0.02	0.09		23.9	54.6	0	2.14577	1.59586	112.179	4.625	7	22	0.68	2.84573	2
38	36	1097	10	15	204	15	776	3	-0.73	3.22	-1.22	-0.49	-0.57	-0.32	-0.08	-0.02				3.8695	2.86942	163.405	5.66667	7	23	0.71	0.45	1
39	15	454	11	150	192	150	766	3.26	-0.18	3.46	-0.34	-1.21		-0.95	-0.55		22.6	89.5	1	1.20027	1.03259	42.6662	5.28571	8	29	0.92	0.756567	1
39	24	734	11	150	192	150	766	3.26	-0.18	3.46	-0.34	-0.93		-1.04	-0.78		20.5	73.8	1	1.46503	1.57115	95.7677	5.9	8	25	0.79	1.94992	1
40	36	1102	11	150	192	150	766	3.26	-0.18	3.46	-0.34	-0.96	-1.02	-1.21	-1.05	-1				2.86027	3.18442	215.875	5.75	8	26	0.82	7.28065	3
40	24	731	7	15	175	15	651	2.7	-1.23	3.08	-0.94	-1.39		-1.17	-0.6		19.1	46.4	0	0.817433	0.891356	64.413	3.44444	7	20	0.64	4.90706	3
40	36	1094	7	15	175	15	651	2.7	-1.23	3.08	-0.94	-1.82	-2.11	-1.06	-0.06	0.2				1.8479	2.16251	92.0873	4.83333	4	21	0.67	0.45	1
41	15	456	10	76	94	76	745	2.6	-1.65	3.21	-1	-1.3		-1.57	-1.35		30.3	69.1	0	1.45334	1.25886	99.2595	4	6	24	0.75	9.61293	4
41	24	736	10	76	94	76	745	2.6	-1.65	3.21	-1	-1.51		-2.2	-1.98		23.1	56.8	0	1.03614	1.2743	88.5448	3.55556	7	26	0.81	12.7501	4
41	36	1095	10	76	94	76	745	2.6	-1.65	3.21	-1	-1.37	-1.53	-1.85	-1.7	-1.56				1.96189	2.56791	147.307	4.5	7	26	0.81	0.45	1
42	15	458	4	39	39	138	802	3	-0.73	3.45	-0.43	-0.43		-0.39	-0.26		23.3	80.4	1	1.74306	1.59166	79.3367	5.14286	3	18	0.56	20.6776	4
42	24	736	4	39	39	138	802	3	-0.73	3.45	-0.43	-0.49		-0.71	-0.67		16.5	46	0	2.32788	2.20977	56.8428	5.4	3	18	0.56	34.7184	4
42	36	1097	4	39	39	138	802	3	-0.73	3.45	-0.43	-1.34	-1.5	-0.47	0.38	0.51				5.63352	4.89226	68.2692	4.91667	3	18	0.56	14.3703	4
43	24	729	4	53	172	53	719	3.1	-0.29	3.86	0.55	0.82		0.85	0.49		30.7	67.6	0	1.04933	1.24549	99.0338	4	6	19	0.59	7.02377	3
43	36	1097	4	53	172	53	719	3.1	-0.29	3.86	0.55	0.46	0.38	0.66	0.56	0.62				3.11476	2.90432	154.772	4.91667	4	20	0.62	4.40186	3
44	15	457	12	13	105	13	750	3	-0.73	3.6	-0.29	-1.54		-0.29	0.53		22.3	70.3	1	1.05841	1.58509	115.259	3.42857	8	29	0.9	6.00929	3
44	24	737	12	13	105	13	750	3	-0.73	3.6	-0.29	-1.3		-0.85	-0.22		26.2	69.1	0	1.33946	1.84097	88.0466	4.11111	8	25	0.78	5.58551	3
44	36	1094	12	13	105	13	750	3	-0.73	3.6	-0.29	-1.42	-1.36	-0.73	0.04	0				2.72853	4.00729	219.316	5.5	8	28	0.87	10.7668	4
45	15	458	10	67	67	88	834	2.9	-0.75	3.18	-0.65	-0.35		0.08	0.3		29.2	73.1	1	1.1142	0.8377	60.5073	2.57143	8	28	0.87	2.90626	2
45	24	732	10	67	67	88	834	2.9	-0.75	3.18	-0.65	-1.17		-0.76	-0.21		22.2	59.7	1	1.03048	1.15556	146.141	4	8	28	0.87	3.51964	2
45	36	1094	10	67	67	88	834	2.9	-0.75	3.18	-0.65	-1.37	-1.26	-0.63	0.15	0.07				2.48144	3.09428	191.016	5	8	29	0.9	4.02979	2
46	24	721	9	118	174	118	742	3.1	-0.29	3.06	-0.47	-0.68		-0.93	-0.84		16.3	82.1	0	1.5736	1.46065	51.6378	3.8	5	19	0.6	0.45	1
46	36	1094	9	118	174	118	742	3.1	-0.29	3.06	-0.47	-1.16	-1.16	-0.9	-0.4	-0.4				2.87394	2.99656	202.108	5.41667	5	25	0.78	6.05437	3
47	15	457	3	117	117	117	780	2.8	-0.99	2.66	-1.29	-1.18		-0.36	0.21		15.8	79.4	1	0.691129	0.765586	59.6598	3	6	20	0.64	3.37498	2
47	24	729	3	117	117	117	780	2.8	-0.99	2.66	-1.29	-1.42		-1.17	-0.58		21.9	71.2	1	1.15789	1.25579	103.583	4.6	6	21	0.67	19.9707	4
47	36	1094	3	117	117	117	780	2.8	-0.99	2.66	-1.29	-1.53	-1.63	-1.11	-0.39	-0.29				2.65877	2.93419	290.276	6.25	5	19	0.6	39.5592	4
48	15	462	10	17	17	31	637	2.8	-1.18	2.57	-2.63	-2.06		-0.81	0.2		25.4	77.1	0	0.541886	2.37149	259.628	2.71429	3	21	0.65	17.5685	4
48	24	729	10	17	17	31	637	2.8	-1.18	2.57	-2.63	-2.55		-1.84	-0.73		14.7	75.7	0	0.954489	1.12771	68.079	3.88889	4	18	0.56	4.1537	3
48	36	1096	10	17	17	31	637	2.8	-1.18	2.57	-2.63	-2.69	-2.75	-1.68	-0.23	-0.18				2.11455	2.40561	105.749	4.83333	4	19	0.59	8.69077	4
49	15	457	6	12	12	18	713	3.55	0.41	3.57	0.29	-1.3		-0.76	-0.24		34.4	76.4	0	0.536057	0.5175	15.362	3.71429	6	21	0.65	10.7855	4
49	24	733	6	12	12	18	713	3.55	0.41	3.57	0.29	-1.33		-0.94	-0.32		28.4	54.8	0	1.64259	1.29565	94.6684	4.3	7	22	0.68	0.45	1
49	36	1097	6	12	12	18	713	3.55	0.41	3.57	0.29	-1.28	-1.34	-0.45	0.35	0.39				4.03963	3.1262	73.5575	5.41667	7	21	0.65	19.1753	4
50	15	458	3	29	201	29	652	2.8	-0.99	2.78	-1.29	-0.35		-0.31	-0.23		25.3	76.3	1	0.369029	0.422314	21.7174	2.57143				7.74273	4
50	24	732	3	29	201	29	652	2.8	-0.99	2.78	-1.29	-0.91		-0.83	-0.51		32.2	66.5	1	2.73422	1.43454	94.0212	3.33333	7	19	0.6	6.92071	3
50	36	1095	3	29	201	29	652	2.8	-0.99	2.78	-1.29	-1.24	-1.14	-0.99	-0.45	-0.54				1.78443	3.03926	232.757	5.33333	7	18	0.57	10.4743	4
51	15	457	12	59	220	59	829	3.25	-0.2	3.31	-0.5	-1.84		-1.44	-0.81		11.4	90	1	1.08489	1.12491	59.9781	5	5	25	0.78	2.39624	2
51	24	729	12	59	220	59	829	3.25	-0.2	3.31	-0.5	-2.05		-1.53	-0.62		27	66.4	1	2.28823	2.19013	159.336	5.22222	7	26	0.81	10.7319	4
51	36	1096	12	59	220	59	829	3.25	-0.2	3.31	-0.5	-1.8	-1.97	-1.11	-0.19	-0.05				3.51771	3.75825	308.57	7.08333	7	26	0.81	8.15118	4
52	24	755	12	117	247	117	1084	3.15	-0.18	3.87	0.71	-1.61	-1.58	-1.02	-0.21	-0.23	33.9	100.8	0	3.12153	2.91942	233.876	3.77778				4.90905	3
52	36	1095	12	117	247	117	1084	3.15	-0.18	3.87	0.71	-1.9	-1.9	-1.53	-0.64	-0.64				4.73057	4.83612	250.179	4.58333	5	23	0.71	4.95112	3
53	15	456	10	19	167	19	778	2.7	-1.42	2.97	-1.22	-2.34		-1.29	-0.25		19.5	62.5	0	0.677429	0.639814	40.0546	3.42857	7	26	0.81	3.63198	2
53	24	730	10	19	167	19	778	2.7	-1.42	2.97	-1.22	-2.28		-1.22	-0.04		33.6	70.2	0	1.30335	1.13922	79.7799	3.6	7	24	0.75	7.08725	3
53	36	1095	10	19	167	19	778	2.7	-1.42	2.97	-1.22	-2.23	-2.36	-1.48	-0.37	-0.24				2.88177	2.3757	89.3513	4.75	7	21	0.65	6.7717	3
54	15	457	8	139	139	139	738	2.8	-1.18	3.67	-0.24	-2.04		-0.72	0.3		28.1	93	1	1.50301	1.15039	58.6506	4.14286	4	22	0.68	2.75913	2
54	24	734	8	139	139	139	738	2.8	-1.18	3.67	-0.24	-2.57		-1.24	0.13		24.1	56.2	0	1.27092	1.37263	101.587	3.1	3	21	0.65	4.47929	3
54	36	1096	8	139	139	139	738	2.8	-1.18	3.67	-0.24	-2.96	-3.13	-1.31	0.56	0.71				2.41768	2.44187	151.677	5.58333	3	21	0.65	5.96444	3
55	15	458	8	5	5	16	935	2.6	-1.47	2.63	-1.52	-1.36		-0.72	-0.15		23.7	63.1	1	0.49	0.681086	17.732	3.71429	4	17	0.53	3.64617	2
55	24	736	8	5	5	16	935	2.6	-1.47	2.63	-1.52	-0.75		-0.79	-0.58		25.5	77.7	0	1.3511	1.6606	63.841	3.8	4	17	0.53	2.94606	2
55	36	1097	8	5	5	16	935	2.6	-1.47	2.63	-1.52	-1.19	-1.47	-0.81	-0.26	-0.02				3.22278	3.44177	127.774	5	4	17	0.53	16.8381	4
56	15	456	11	28	176	28	760	2.8	-1.18	2.92	-1.13	-0.45		-0.78	-0.78		20.4	85.7	1	0.3293	0.269267	6.859	1.16667	3	19	0.6	1.44765	1
56	24	730	11	28	176	28	760	2.8	-1.18	2.92	-1.13	-1.24		-1.65	-1.41		23.3	80	0	0.922211	0.897344	83.43	2.66667				8.19605	4
56	36	1095	11	28	176	28	760	2.8	-1.18	2.92	-1.13	-1.96	-2.07	-1.27	-0.3	-0.21				1.71232	1.83492	88.3557	5.08333	5	20	0.64	10.0071	4
57	15	459	10	28	53	28	830	2.25	-2.39	2.31	-2.34	-1.76		-1.21	-0.53		21	74.9	1	1.67455	0.884725	56.5351	4.25	4	23	0.71	7.58735	3
57	24	729	10	28	53	28	830	2.25	-2.39	2.31	-2.34	-1.98		-1.28	-0.3		18.1	72.7	1	1.91383	1.55837	80.8662	4.33333	4	23	0.71	5.17246	3
57	36	1094	10	28	53	28	830	2.25	-2.39	2.31	-2.34	-2.47	-2.5	-1.84	-0.55	-0.52				2.94775	1.97303	97.5914	6.16667	7	26	0.81	149.106	4
58	15	459	15	15	15	19	610	2.8	-1.18	3.08	-0.91	0.15		0.38	0.45		17.6	60.8	1	0.985925	1.0415	83.3976	2.875	7	28	0.89	2.05534	1
58	24	729	15	15	15	19	610	2.8	-1.18	3.08	-0.91	0.57		0.46	0.19		30.2	86.5	1	2.59368	2.1501	155.419	4.88889	7	28	0.89	3.25333	2
58	36	1094	15	15	15	19	610	2.8	-1.18	3.08	-0.91	0.47	0.39	0.64	0.59	0.66				4.17878	3.79792	178.083	4.83333	7	29	0.92	5.58784	3
59	15	458	7	44	142	44	747	2.25	-2.54	2.57	-2.31	-0.76		-1.38	-1.42		21.3	69.4	1	0.6738	0.9929	66.2804	4.14286	2	15	0.48	0.857124	1
59	24	729	7	44	142	44	747	2.25	-2.54	2.57	-2.31	-0.91		-1.7	-1.75		23.2	76.5	1	1.4001	2.50342	203.552	5	4	17	0.54	8.05937	4
59	36	1095	7	44	142	44	747	2.25	-2.54	2.57	-2.31	-0.91	-1.04	-1	-0.78	-0.67				2.71312	3.34383	171.02	5.16667	4	19	0.6	4.71765	3
60	15	459	7	120	253	120		3.8	1.18	4.41	1.44	-0.62		-0.26	0		40.1	74.8	1	1.00826	0.90715	25.5104	3	3	21	0.67	1.94564	1
60	24	732	7	120	253	120		3.8	1.18	4.41	1.44	-1.05		-0.35	0.25		27.7	89.9	0	1.65144	1.81678	67.4633	4.66667	4	20	0.64	1.81541	1
60	36	1095	7	120	253	120		3.8	1.18	4.41	1.44	-0.59	-0.72	-0.22	0.1	0.2				2.75283	2.8205	107.382	4.5	4	22	0.7	9.16066	4
61	15	461	4	220	311	220	570	3.4	0.36	3.49	0.31	-1.72		-0.42	0.48		31.4	72.7	1	0.289657	0.253557	16.0077	1.42857	7	20	0.62	0.45	1
61	24	736	4	220	311	220	570	3.4	0.36	3.49	0.31	-2.05		-0.97	0.16		13.8	84.3	1	3.03049	2.8887	281.505	2.11111				3.44333	2
61	36	1094	4	220	311	220	570	3.4	0.36	3.49	0.31	-2.03	-2.05	-0.87	0.38	0.41				2.74899	3.04747	307.674	3.66667	7	22	0.68	52.8402	4
62	24	736	10	76	92	76	668	3.5	0.57	3.67	0.33	-0.37		-1.02	-1.23		20.3	97.5	0	2.748	2.66676	258.527	4.77778	7	24	0.75	8.09542	4
62	36	1095	10	76	92	76	668	3.5	0.57	3.67	0.33	-0.32	-0.38	-0.46	-0.46	-0.41				3.83103	3.6917	353.025	6.16667	7	24	0.75	6.18376	3
63	15	456	10	117	148	117		3.75	0.8	3.56	-0.07	0.58		1.76	1.97		35.4	66.7	1	1.5296	1.71616	115.65	4.71429	6	22	0.68	3.99153	2
63	24	737	10	117	148	117		3.75	0.8	3.56	-0.07	0.32		0.87	0.93		28.9	81.4	1	2.1203	2.12601	191.877	4.4	6	23	0.71	2.857	2
63	36	1096	10	117	148	117		3.75	0.8	3.56	-0.07	0.16	0.14	0.36	0.42	0.44				2.70373	2.77537	204.427	3.66667	6	24	0.75	8.70333	4
64	15	457	8	8	8	13	759	2.75	-1.3	2.91	-1.36	-1.93		-0.92	-0.04		22.5	83	1	0.877814	0.994171	67.6108	3.42857	8	26	0.81	12.3518	4
64	24	729	8	8	8	13	759	2.75	-1.3	2.91	-1.36	-2.38		-1.03	0.29		24.5	67.3	1	1.58473	1.61752	132.083	3.6	7	26	0.81	2.86645	2
64	36	1094	8	8	8	13	759	2.75	-1.3	2.91	-1.36	-1.74	-1.87	-1.1	-0.24	-0.12				4.24891	3.65299	127.92	5.75	8	26	0.81	8.07554	4
65	15	456	3	20	136	20	882			2.85	-1.88	-2.38		-1.64	-0.7		21.3	95.4	1	0.646129	0.904957	45.9986	3.14286	5	18	0.56	0.841582	1
65	24	733	3	20	136	20	882			2.85	-1.88	-2.58		-2.09	-1.05		25.7	69.7	0	1.4813	1.31059	71.7635	4.2	5	18	0.56	5.05482	3
65	36	1096	3	20	136	20	882			2.85	-1.88	-2.85	-2.9	-1.67	-0.07	-0.02				2.70862	2.16988	147.343	5	5	18	0.56	0.45	1
66	24	735	10	150	384	150	669	3.5	0.57	3.94	0.63	-1.4		-0.31	0.58		24.2	89.4	0	2.81817	2.8075	124.7	3.55556	8	29	0.9	8.55934	4
66	36	1097	10	150	384	150	669	3.5	0.57	3.94	0.63	-1.66	-1.79	-0.85	0.1	0.21				2.87077	3.37505	176.209	4.75	8	29	0.9	10.6583	4
67	15	458	8	59	147	59	832	3.1	-0.29	3.48	-0.32	0.05		0.6	0.79		21.3	71.2	1	0.8928	0.88985	107.006	4	6	20	0.62	4.32763	3
67	24	731	8	59	147	59	832	3.1	-0.29	3.48	-0.32	-0.6		-0.09	0.26		19.4	205.7	0	1.30649	1.25647	70.9938	4.44444	6	24	0.75	9.44009	4
67	36	1096	8	59	147	59	832	3.1	-0.29	3.48	-0.32	-1.14	-1.41	-0.56	0.07	0.29				3.90607	2.76791	160.587	6.27273	6	22	0.68	1.59161	1
68	15	457	1	15	15	64	996	3	-0.73	3.16	-1.35	0.37		0.48	0.45		20.6	82.9	0	1.23613	2.09175	174.873	3.625	5	18	0.57	2.03639	1
68	24	729	1	15	15	64	996	3	-0.73	3.16	-1.35	0.7		0.56	0.24		22.1	75.2	1	1.92658	2.76322	226.385	3.66667	5	20	0.64	5.44582	3
68	36	1094	1	15	15	64	996	3	-0.73	3.16	-1.35	0.34	0.31	0.28	0.17	0.19				2.34693	2.10267	190.821	4.91667	5	15	0.48	4.34464	3
69	15	456	9	151	151	151	791	3.05	-0.62	3.49	-0.43	-1.32		-0.88	-0.4		19.1	72.5	1	0.630012	0.614638	35.1593	2.125	7	27	0.85	0.45	1
69	24	730	9	151	151	151	791	3.05	-0.62	3.49	-0.43	-2.05		-0.66	0.57		32.1	86.6	1	1.11983	1.12482	87.8207	3.77778	7	27	0.85	6.15411	3
69	36	1094	9	151	151	151	791	3.05	-0.62	3.49	-0.43	-1.85	-1.96	-0.81	0.29	0.38				2.63608	2.85928	142.772	4.83333	6	26	0.82	9.19496	4
70	15	462	10	48	48	149	1059	2.8	-0.99	3.33	-0.63	-0.15		-0.61	-0.76		29.2	84.3	0	0.615971	0.926214	48.5926	2.14286	8	29	0.9	0.45	1
70	24	736	10	48	48	149	1059	2.8	-0.99	3.33	-0.63	-0.12		-0.45	-0.63		24.3	96.4	0	1.62186	1.45676	97.5529	3.7	8	29	0.9	2.02835	1
70	36	1094	10	48	48	149	1059	2.8	-0.99	3.33	-0.63	-0.55	-0.11	-0.22	0.07	-0.28				3.90288	2.6227	95.9155	4.75	8	29	0.9	6.40259	3
71	24	729	12	118	118	118	930	2.6	-1.47	2.56	-1.54	-0.08		-1.31	-1.86		24	94.9	0	1.03984	0.637467	45.3464	2.77778	8	29	0.9	7.17007	3
71	36	1096	12	118	118	118	930	2.6	-1.47	2.56	-1.54	-0.59	-0.59	-1.41	-1.61	-1.61				1.98385	1.65421	86.6019	3.33333	8	29	0.9	6.6917	3
72	15	458	10	66	541	66	685	2.9	-0.75	3	-0.78	-1.63		-0.74	-0.01		20.1	69.5	0	1.02067	0.641975	38.1956	2.875	7	27	0.84	3.838	2
72	24	734	10	66	541	66	685	2.9	-0.75	3	-0.78	-1.99		-1.05	0.02		40	82.3	1	1.33482	0.759056	45.6603	4.22222	7	26	0.81	6.81461	3
72	36	1094	10	66	541	66	685	2.9	-0.75	3	-0.78	-2.55	-2.63	-0.94	0.76	0.83				2.85741	2.12715	164.605	5.16667	7	26	0.81	2.3069	2
73	15	459	0	238	483	238	752	3.4	0.11	3.6	0.08	0.74		0.08	-0.27		28.1	80.1	1	0.4784	0.540114	20.0067	1.85714	5	20	0.62	2.74359	2
73	24	730	0	238	483	238	752	3.4	0.11	3.6	0.08	-0.17		0.03	0.14		30.4	108.8	0	2.25413	1.97776	140.765	4	5	18	0.56	3.77213	2
73	36	1096	0	238	483	238	752	3.4	0.11	3.6	0.08	-0.21	-0.29	-0.56	-0.67	-0.6				4.99074	4.53292	173.383	5.66667	5	18	0.56	8.35971	4
74	15	455	6	178	178	178	804	2.9	-0.75	2.87	-1.27	0.38		-0.08	-0.34		24.5	80.9	1	1.98056	1.43447	13.6416	3.57143	5	20	0.62	11.2186	4
74	24	731	6	178	178	178	804	2.9	-0.75	2.87	-1.27	-0.91		-0.45	0		32	85.6	1	2.03082	1.77684	108.28	4.2	5	18	0.56	2.07735	2
74	36	1095	6	178	178	178	804	2.9	-0.75	2.87	-1.27	-0.85	-0.93	-0.8	-0.52	-0.46				2.64688	2.9077	160.78	5.16667	4	19	0.59	4.77342	3
75	15	460	14	103	210	103	775	2.2	-2.53	2.14	-2.7	-1.07		-1.5	-1.41		35.8	76.4	0	0.912229	0.854657	99.7956	2.85714	7	29	0.9	4.0563	2
75	24	730	14	103	210	103	775	2.2	-2.53	2.14	-2.7	-1.67		-1.91	-1.38		16.3	76.1	0	1.4371	1.17969	82.3353	3.7	7	28	0.87	2.55813	2
75	36	1095	14	103	210	103	775	2.2	-2.53	2.14	-2.7	-1.37	-1.32	-1.74	-1.4	-1.45				1.78216	1.76549	114.144	4.83333	6	27	0.84	5.73036	3
76	15	464	0	151	232	151	802	3.7	0.7	3.8	0.32	-2.44		-0.39	1		30.1	86	1	0.656114	0.699886	39.9034	2.28571	5	14	0.43	1.75325	1
76	24	741	0	151	232	151	802	3.7	0.7	3.8	0.32	-2.05		-0.82	0.36		20.8	90.2	1	0.77278	0.83933	81.432	2.2	5	17	0.53	2.03837	1
76	36	1096	0	151	232	151	802	3.7	0.7	3.8	0.32	-2.23	-2.5	-0.59	0.94	1.18				2.71566	3.63047	265.395	4.5	6	19	0.59	5.83354	3
77	15	456	10	126	151	126	837	3	-0.52	3.15	-0.79	-0.98		-1.19	-1.04		22.2	81.5	0	0.773	1.12443	93.6108	3.5	7	25	0.78	2.41487	2
77	24	731	10	126	151	126	837	3	-0.52	3.15	-0.79	-1.36		-0.92	-0.29		27.7	86.7	0	1.42455	1.67883	115.781	3.81818	6	25	0.78	2.39601	2
77	36	1095	10	126	151	126	837	3	-0.52	3.15	-0.79	-1.69	-1.72	-1.34	-0.57	-0.54				2.18506	2.76848	158.917	4.75	6	24	0.75	5.56376	3
78	15	454	8	14	61	14	748	2.75	-1.3	2.63	-2.48	-1.61		-2.68	-2.72		13.3	77.1	1	1.15957	0.8641	80.5564	3.71429	6	23	0.71	14.7965	4
78	24	730	8	14	61	14	748	2.75	-1.3	2.63	-2.48	-2.1		-2.06	-1.35		30.4	81.1	1	1.10656	1.08282	109.396	4.6	6	23	0.71	7.4426	3
78	36	1101	8	14	61	14	748	2.75	-1.3	2.63	-2.48	-2.12	-2.15	-1.58	-0.63	-0.6				3.54152	2.43912	216.046	5.91667	4	18	0.56	0.45	1
79	15	457	10	73	73	73	813	2.8	-1.18	2.63	-1.87	-0.97		-0.91	-0.65		20.8	76.7	1	0.582914	0.466157	28.856	3.42857	7	24	0.75	2.81561	2
79	24	732	10	73	73	73	813	2.8	-1.18	2.63	-1.87	-1.96		-0.82	0.3		25.3	88.8	0	1.48678	1.66738	141.156	4	8	27	0.84	3.11471	2
79	36	1094	10	73	73	73	813	2.8	-1.18	2.63	-1.87	-1.85	-1.85	-0.51	0.73	0.73				3.25036	3.85814	363.513	5.41667	8	29	0.9	4.47386	3
80	15	458	14	71	186	71	704	3	-0.52	2.93	-0.82	-1.08		-0.66	-0.26		25.5	99.4	0	0.9362	0.775625	44.0163	3.75	6	24	0.75	4.34289	3
80	24	734	14	71	186	71	704	3	-0.52	2.93	-0.82	-0.99		-0.93	-0.58		15.5	86.3	1	2.33362	2.13208	158.157	4.33333	6	26	0.81	8.7457	4
80	36	1094	14	71	186	71	704	3	-0.52	2.93	-0.82	-1.5	-1.45	-1.06	-0.34	-0.39				3.7488	2.92285	135.306	5.66667	5	22	0.68	10.7265	4
81	15	455	12	157	157	165	983	2.95	-0.63	2.83	-1.17	-0.9		0.54	1.23		29.1	90.2	1	0.977171	0.730314	30.0303	4	7	25	0.78	2.63098	2
81	24	733	12	157	157	165	983	2.95	-0.63	2.83	-1.17	-1.26		0.16	1.11		33.1	77.8	0	1.99021	1.56187	74.3712	5.6	7	25	0.78	4.84112	3
81	36	1096	12	157	157	165	983	2.95	-0.63	2.83	-1.17	-1.22	-1.45	0.54	1.67	1.85				3.20625	2.59618	189.62	6.25	7	23	0.71	2.72698	2
82	24	733	8	99	281	99	743	2.9	-0.75	3.05	-0.8	-1.59		-0.69	0.2		28	75	0	1.5563	1.37034	82.8403	5.22222	4	16	0.5	0.45	1
82	36	1094	8	99	281	99	743	2.9	-0.75	3.05	-0.8	-1.82	-1.95	-0.49	0.73	0.84				3.34225	3.30199	175.8	5.33333	4	16	0.5	9.12687	4
83	15	458	4	149	163	149	772	3.4	0.11	3.62	-0.5	-0.85		0.02	0.52		28.5	71.9	0	0.625787	0.430775	32.6202	3	6	17	0.53	9.54235	4
83	24	732	4	149	163	149	772	3.4	0.11	3.62	-0.5	-1.22		-0.62	0.04		31.4	84.4	0	1.13597	1.12716	60.1126	4.77778	7	21	0.65	0.45	1
83	36	1094	4	149	163	149	772	3.4	0.11	3.62	-0.5	-1.07	-0.98	-0.07	0.75	0.69				2.36662	1.6169	139.024	5	6	17	0.53	6.42664	3
84	15	454	0	136	136	145	740	2.9	-0.75	3.09	-0.78	-2.53		-2.03	-1.06		32.8	70.4	0	0.903513	0.89615	53.2329	3.25	5	14	0.43	1.04979	1
84	24	731	0	136	136	145	740	2.9	-0.75	3.09	-0.78	-2.82		-2.03	-0.69		15.1	74.6	0	1.09498	1.09597	97.7916	3.33333	6	15	0.46	0.820292	1
84	36	1096	0	136	136	145	740	2.9	-0.75	3.09	-0.78	-3.06	-3.06	-1.7	0.2	0.2				3.53152	2.45915	199.899	5.66667	6	16	0.5	24.2275	4
85	15	454	5	13	13	13	652	3	-0.52	2.55	-2.26	-3.26		-2.29	-0.81		37.1	72.9	0	0.2156	0.225812	18.4516	1	4	16	0.51	5.39173	3
85	24	729	5	13	13	13	652	3	-0.52	2.55	-2.26	-2.91		-2.95	-1.85		19.3	75.2	1	0.456489	0.599089	28.3192	2	7	21	0.67	6.66184	3
85	36	1099	5	13	13	13	652	3	-0.52	2.55	-2.26	-3.34	-3.29	-2.32	-0.36	-0.41				1.72503	2.09738	138.191	4.33333	5	20	0.64	9.11083	4
